# Supplementary material for: Expression of Plet1 controls interstitial migration of murine small intestinal dendritic cells
Source: PubMed Central journal article supplement (PMC6492104; doi:10.1002/eji.201847671), 2018-12-14

# European Journal of Immunology

**Supporting Information**

**for**

**DOI 10.1002/eji.201847671**

Julien J. Karrich, Mónica Romera-Hernández, Natalie Papazian,  
Sharon Veenbergen, Ferry Cornelissen, Patricia Aparicio-Domingo,  
Frances H. Stenhouse, C. Diana Peddie, Remco M. Hoogenboezem,  
Chelsea W. J. den Hollander, Terri Gaskell, Tanya Medley, Louis Boon,  
C. Clare Blackburn, David R. Withers, Janneke N. Samsom and Tom Cupedo

**Expression of Plet1 controls interstitial migration  
of murine small intestinal dendritic cells**

**SUPPLEMENTARY TABLES AND FIGURES**

**Expression of Plet1 controls interstitial migration of murine small intestinal dendritic cells**

Julien J. Karrich<sup>1</sup>, Mónica Romera-Hernández<sup>1</sup>, Natalie Papazian<sup>1</sup>, Sharon Veenbergen<sup>2</sup>, Ferry Cornelissen<sup>1</sup>, Patricia Aparicio-Domingo<sup>1\*</sup>, Frances H. Stenhouse<sup>3</sup>, C. Diana Peddie<sup>3</sup>, Remco M. Hoogenboezem<sup>1</sup>, Chelsea W. J. den Hollander<sup>1</sup>, Terri Gaskell<sup>3,\*\*</sup>, Tanya Medley<sup>3,\*\*\*</sup>, Louis Boon<sup>4</sup>, C. Claire Blackburn<sup>3</sup>, David R. Withers<sup>5</sup>, Janneke N. Samsom<sup>2</sup>, and Tom Cupedo<sup>1</sup>.

**Supplementary table 1: list of primer sequences used for RT-PCR**

|             |         |                             |
|-------------|---------|-----------------------------|
| Plet1       | Forward | 5'-CGTGGTCCTTGATAACATCT-3'  |
| Plet1       | Reverse | 5'-TCACGGCACTGACTGAA-3'     |
| IL-12P40    | Forward | 5'-TGGCTGGTGCAAAGAA-3'      |
| IL-12P40    | Reverse | 5'-GGGTCTGGTTTGATGATGT-3'   |
| IL1 $\beta$ | Forward | 5'-GGACCCCAAAGATGAAG-3'     |
| IL1 $\beta$ | Reverse | 5'-CCACGGGAAAGACACAG-3'     |
| Il-23p19    | Forward | 5'-GCCCGTATCCAGTGT-3'       |
| Il-23p19    | Reverse | 5'-CTGCCACTGCTGACTAGAA-3'   |
| IL-6        | Forward | 5'-TCGGAGGCTTAATTACACA-3'   |
| IL-6        | Reverse | 5'-CTGGCTTTGTCTTTCTTGTT-3'  |
| Gapdh       | Forward | 5'-TCAACGGCACAGTCAAG-3'     |
| Gapdh       | Reverse | 5'-GCTCCACCCTTCAAGTG-3'     |
| TNF         | Forward | 5'-GGGGGCTTCCAGAACT-3'      |
| TNF         | Reverse | 5'-GGGCCATAGAAGTATGATGAG-3' |

**Supplementary Table 2. Genes overexpressed in CD103+CD11b+ intestinal DC and induced after colonization.**

| Gene Symbol   | Gene Title                                            | Protein Class and Function                                         |
|---------------|-------------------------------------------------------|--------------------------------------------------------------------|
| Trim72        | Tripartite Motif Containing 72                        |                                                                    |
| Clec4a3       | C-type lectin domain family 4, member a3              | Immunoglobulin receptor superfamily                                |
| Gbp3          | Guanylate Binding Protein 3                           | Heterotrimeric G-protein                                           |
| Gbp7          | Guanylate Binding Protein 7                           | Heterotrimeric G-protein                                           |
| Vwa5a         | Von Willebrand Factor A Domain Containing 5A          | Serine protease inhibitor                                          |
| Cd86          | Cluster of Differentiation 86                         | T-lymphocyte activation antigen                                    |
| <b>Plet1</b>  | <b>Placenta Expressed Transcript 1</b>                | <b>Cell migration and cellular adhesion to matrix proteins[14]</b> |
| Tha1          | Threonine Aldolase                                    | Aldolase                                                           |
| Ifitm3        | Interferon Induced Transmembrane Protein 3            |                                                                    |
| Gbp8          | Guanylate Binding Protein 3                           | Heterotrimeric G-protein                                           |
| H2-Eb1        | histocompatibility 2, class II antigen E beta         | Major histocompatibility complex antigen                           |
| Tmem171       | Transmembrane Protein 171                             |                                                                    |
| Rtp4          | Receptor Transporter Protein 4                        | Olfactory receptor binding                                         |
| Blm           | Bloom Syndrome RecQ Like Helicase                     | DNA helicase                                                       |
| Gm4759        | GTPase, very large interferon inducible 1 pseudogene  |                                                                    |
| <b>Lgals9</b> | <b>Galectin 9</b>                                     | <b>Cell adhesion molecule, signaling molecule[43]</b>              |
| Pgs1          | Phosphatidylglycerophosphate Synthase 1               | Cytokine, extracellular matrix protein, receptor                   |
| Spi1          | Transcription Factor PU.1                             | Nucleic acid binding signaling molecule transcription factor       |
| <b>Celsr1</b> | <b>Cadherin, EGF LAG Seven-Pass G-Type Receptor 1</b> | <b>G-protein coupled receptor cadherin, cell adhesion[44]</b>      |
| Ltf           | Lactotransferrin                                      | Serine transferase/carrier protein                                 |

**Supplementary Table 3: List of differentially expressed genes in Plet1<sup>-/-</sup> CD11b<sup>+</sup>CD103<sup>+</sup> DCs versus Plet1<sup>+/-</sup> CD11b<sup>+</sup>CD103<sup>+</sup> DCs.**

|          | base mean   | log2 fold change | p value    |
|----------|-------------|------------------|------------|
| Zg16     | 295,7178293 | 3,803648649      | 1,01E-29   |
| Clca3    | 253,6791646 | 3,666473016      | 2,22E-26   |
| Reg1     | 324,7811166 | 3,581519814      | 1,53E-21   |
| Fcgbp    | 317,5764988 | 3,394766698      | 4,53E-20   |
| Gpx3     | 175,4673748 | 3,313596713      | 1,69E-17   |
| Reg3g    | 177,777684  | 3,304552688      | 1,04E-18   |
| Sparc    | 151,9958387 | 3,124838317      | 3,24E-15   |
| Spink4   | 144,0538515 | 2,82444654       | 5,62E-12   |
| Muc13    | 151,0492757 | 2,520111199      | 2,47E-10   |
| Mgst1    | 97,71867738 | 2,325635251      | 2,90E-08   |
| Slc12a2  | 158,0932112 | 2,206663867      | 5,78E-09   |
| Igj      | 2862,760185 | 2,201395662      | 1,11E-06   |
| Krt18    | 291,7483196 | 2,195756014      | 1,19E-09   |
| Cldn7    | 181,643058  | 2,164610628      | 4,94E-08   |
| Muc2     | 212,5394136 | 2,158785949      | 9,34E-10   |
| Krt19    | 490,8249061 | 2,144642548      | 2,92E-09   |
| Gas6     | 74,73268984 | 2,06601817       | 2,94E-06   |
| Ppp1r1b  | 77,20610416 | 2,054836619      | 3,10E-06   |
| Lgals2   | 441,7932377 | 2,033738434      | 3,10E-08   |
| Mttp     | 158,4624469 | 2,014767214      | 3,91E-06   |
| Kcnn4    | 63,56646777 | 1,974365102      | 1,18E-05   |
| Atp1b1   | 119,0737894 | 1,951990887      | 3,07E-06   |
| Guca2a   | 76,92997669 | 1,951740744      | 1,25E-05   |
| Prap1    | 204,3643923 | 1,951191601      | 4,26E-08   |
| Lgals4   | 299,1707807 | 1,905245488      | 5,56E-08   |
| Sdc1     | 53,51943065 | 1,904108717      | 2,56E-05   |
| Cyr61    | 138,7789374 | 1,898323788      | 4,08E-07   |
| Dcn      | 426,5102989 | 1,844637034      | 3,70E-05   |
| Aldob    | 274,8394836 | 1,825978801      | 1,73E-06   |
| Ces2e    | 104,1818783 | 1,814291578      | 4,33E-05   |
| Lypd8    | 261,0998182 | 1,794928927      | 8,05E-06   |
| Gpx2     | 105,359648  | 1,784097125      | 4,13E-05   |
| Krt7     | 100,1245896 | 1,780515681      | 3,64E-05   |
| Adh6a    | 69,84324206 | 1,769436703      | 5,27E-05   |
| Papss2   | 85,86906265 | 1,745778184      | 0,00010075 |
| Klf5     | 118,1354687 | 1,721421536      | 5,96E-05   |
| Ep1      | 73,43456377 | 1,696634177      | 0,00015123 |
| Fabp1    | 187,8102662 | 1,688513312      | 2,92E-05   |
| Fam84b   | 89,34915787 | 1,665026519      | 0,00011788 |
| Tmc4     | 82,58530517 | 1,645956974      | 0,00012863 |
| Klf2     | 206,2340749 | 1,643823934      | 4,85E-05   |
| Cd81     | 182,9001769 | 1,618630249      | 3,83E-06   |
| Nusap1   | 160,7075052 | 1,60856318       | 1,53E-05   |
| Myo1a    | 161,1085243 | 1,592656852      | 0,0002262  |
| Sema4a   | 96,41458019 | 1,564883544      | 0,00017622 |
| Alpi     | 210,8479608 | 1,559413192      | 6,81E-05   |
| Id3      | 197,1149588 | 1,53002372       | 3,76E-05   |
| Smc2     | 183,5783059 | 1,521078056      | 1,49E-05   |
| Mapk13   | 129,5006959 | 1,515005186      | 0,00010016 |
| Elf3     | 217,7544976 | 1,500207478      | 6,72E-05   |
| Tmem176b | 147,9234055 | 1,471606326      | 0,00030006 |
| Fabp2    | 359,0487168 | 1,444147602      | 0,00025921 |
| Phlda1   | 313,159568  | 1,327781391      | 0,00019923 |
| Dnaja4   | 498,9556356 | 1,222627282      | 0,00017997 |
| Golm1    | 370,2671965 | 1,134474633      | 0,00014362 |
| Dnajb1   | 12036,73036 | 1,036998264      | 1,94E-05   |
| Hspd1    | 6512,07026  | 0,98247914       | 9,43E-05   |
| Txnip    | 1066,518523 | 0,941460822      | 5,51E-06   |
| Hspa1b   | 20320,58879 | 0,908284873      | 4,36E-05   |

Karrich, J.J. et al.

|          |             |              |            |
|----------|-------------|--------------|------------|
| Tsc22d3  | 1636,639014 | 0,889774248  | 6,21E-05   |
| Hsp90aa1 | 13237,02169 | 0,80967743   | 5,91E-05   |
| Pts      | 1988,39691  | 0,692957305  | 0,00024314 |
| Mon1b    | 757,3008838 | -0,842326384 | 0,00023682 |
| Kdm6a    | 1313,905028 | -0,909889833 | 4,43E-05   |
| Mapkbp1  | 128,0258742 | -1,725894145 | 2,32E-05   |
| Plet1    | 5055,29523  | -6,679885454 | 3,52E-284  |

## Supplementary Figure Legends

**Supplementary figure 1: Gating strategy for small intestinal DCs.** representative FACS plots of total Lamina propria, describing the gating strategy used in this study to isolate different murine DC subsets.

**Supplementary figure 2: Plet1 is absent from macrophages and monocytes.** representative FACS plots showing absence of Plet1 on CD64<sup>+</sup> monocytes and macrophages in Lamina Propria of WT mice.

**Supplementary figure 3: Plet1-deficiency does not affect BMDC development or activation.**

(A) Frequency of CD11c<sup>+</sup>MHCII<sup>+</sup> BMDC after seven days of culture, using Plet1<sup>+/-</sup> or Plet1<sup>-/-</sup> bone marrow. (B) Frequency of activated Plet1<sup>-/-</sup> BMDC, as shown in A, expressing the costimulatory molecules CD40, or CD86, as compared to littermate controls, quantified by flow cytometry. (C) Surface expression of costimulatory molecules (CD40, CD80, CD83, and CD86) on Plet1<sup>+/-</sup> (black bars), or Plet1<sup>-/-</sup> (grey bars) BMDC, following TLR4, and TLR7 stimulation, shown as mean fluorescence intensity quantified by flow cytometry. (D) Relative transcript levels by QPCR (normalized to GAPDH) of activation-induced cytokines (IL6, IL1 $\beta$ , IL23, IL12, and TNF) on Plet1<sup>-/-</sup> BMDC or littermate controls, following culture in the presence or absence of Pam3Cys (TLR3 ligand), LPS (TLR4 ligand), or Imiquimod (TLR7 ligand).

**Supplementary figure 4: *in-silico* 3D structure prediction of Plet1 protein reveals homology with the integrin-binding domain of Reelin.** (A) Ribbon diagram 3D structure representation of murine, and human Plet1 protein and the integrin-binding N-terminal domain of Reelin protein as predicted by Phyre 2 (RCSB Protein Databank, structure c3cooB). (B) Alignment of protein sequence of human and mouse Plet1 with human or mouse Reelin.

### Supplementary figure 1

#### Small intestinal Lamina Propria

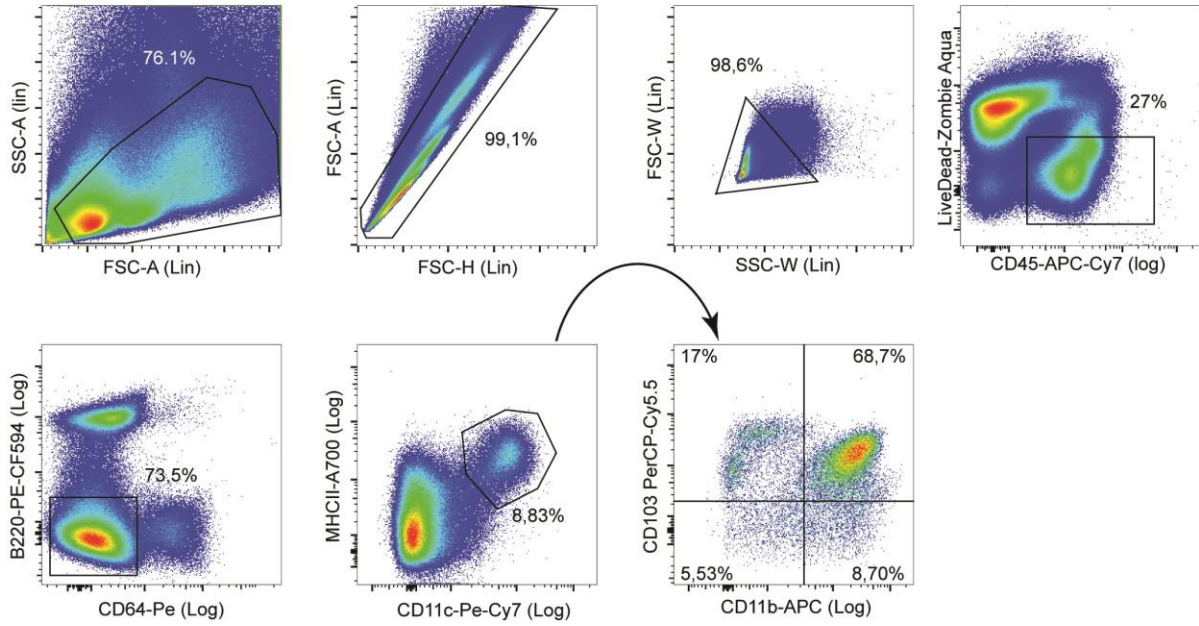

### Supplementary figure 2

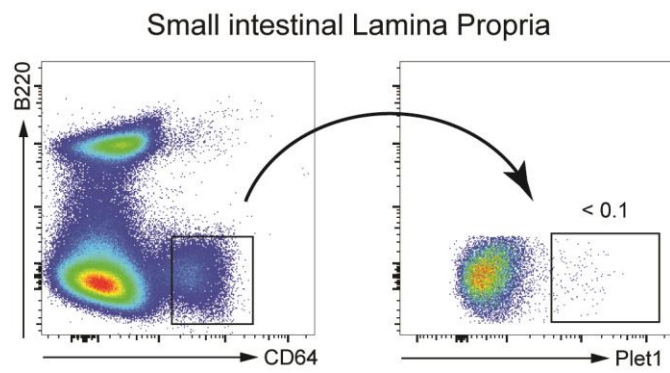



**Supplementary figure 3**

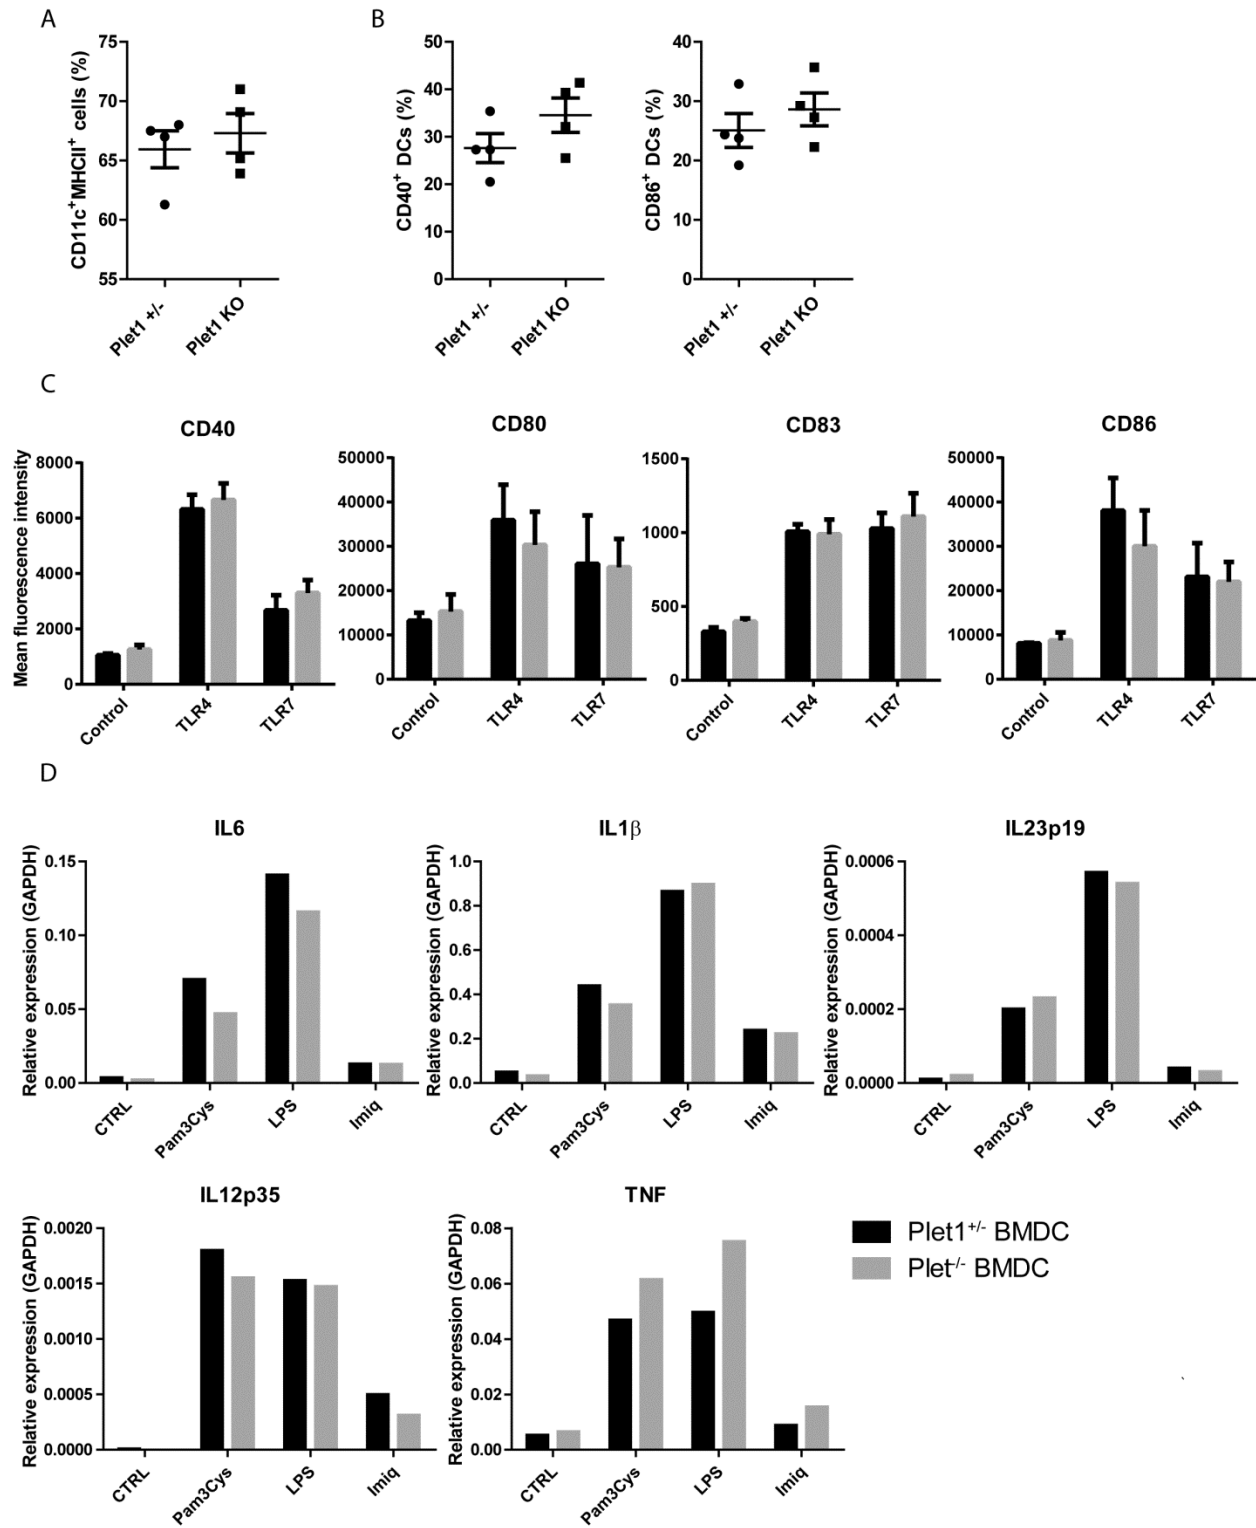

Supplement: EJI-49-290-s002.pdf [file EJI-49-290-s002.pdf]
